# Supplementary material for: The eIF3a translational control axis in the Wnt/β-catenin signaling pathway and colon tumorigenesis
Source: PubMed Central journal article supplement (PMC11646415; doi:10.1016/j.canlet.2024.217303), 2024-10-15
Supplement: NIHMS2038805-supplement-Supplemental_Information.pdf [file NIHMS2038805-supplement-Supplemental_Information.pdf]

**The eIF3a translational control axis in the Wnt/ $\beta$ -catenin signaling pathway and colon tumorigenesis**

Zizheng Dong, Anuj Ojha, Lincoln Barlow, Liyun Luo, Jing-Yuan Liu, Jian-Ting Zhang\*

Department of Cell and Cancer Biology, The University of Toledo College of Medicine and Life Sciences,  
Toledo, Ohio, USA.

**Running Title:** Translational control in Wnt/ $\beta$ -catenin signaling and colon tumorigenesis

\* To whom all correspondence should be addressed: Department of Cell and Cancer Biology, The University of Toledo College of Medicine and Life Sciences, 3000 Arlington Ave, Toledo, Ohio, USA. Tel: 419-383-4161; Email: [jianting.zhang@utoledo.edu](mailto:jianting.zhang@utoledo.edu)

**Supplemental Table S1: Primers for eIF3a promoter cloning, PCR, and CHIP Assay**

| <b>Primer Name</b>  | <b>Sequence</b>                                      |
|---------------------|------------------------------------------------------|
| <b>eIF3aProF</b>    | 5'-GC AAG CTT CCT TCT GAG CTC ACC TTT ATT TCG TAC-3' |
| <b>eIF3aProR</b>    | 5'-CT CCA TGG CTT GGC GGC AGG CTC AGC TCA CCC-3'     |
| <b>eIF3aPromut1</b> | 5'-CT CCA TGG GAC TTG TGC GGA GTC GTG CAG-3'         |
| <b>eIF3aPromut2</b> | 5'-GCA AGC TTC AAT CTG CAG ACG TTT GCT TGT-3'        |
| <b>CH3aF</b>        | 5'-GC AAG CTT CTC AGC ATT TTC ACG TAG CCA AGA-3'     |
| <b>CH3aR</b>        | 5'-CT CCA TGG TCC TGG ATA GCG TTA GGG AGA CAG-3'     |
| <b>eIF3aRTF</b>     | 5'-AGATGAGGACAGAGGACCTAGAC-3'                        |
| <b>eIF3aRTR</b>     | 5'-TCAGCATTCCGCCAGGATGA-3'                           |
| <b>GAPDHF</b>       | 5'-AAGGACTCATGACCACAGTCCAT-3'                        |
| <b>GAPDHR</b>       | 5'-CCATCACGCCACAGTTTTC-3'                            |

**Table S2. Colon Cancer and Benign Adenoma Patient Characteristics and eIF3a Expression**

| <b>Characteristics</b> | <b>Cancer Patients</b> | <b>Mean eIF3a Increase (fold)</b> | <b><i>P</i> value</b> | <b>Normal Patients</b> | <b>Mean eIF3a Increase (fold)</b> | <b><i>P</i> value</b> |
|------------------------|------------------------|-----------------------------------|-----------------------|------------------------|-----------------------------------|-----------------------|
| <b>Total Patients</b>  | 22 (100%)              | 6.0±8.1                           |                       | 8 (100%)               | 3.2±0.8                           |                       |
| <b>Age (years)</b>     | 66.0±15.2              |                                   |                       | 66.8±21.4              |                                   |                       |
| <b>Gender</b>          |                        |                                   |                       |                        |                                   |                       |
| Male                   | 5 (22.7%)              | 3.5±2.1                           | 0.22                  | 4 (50%)                | 3.1±0.6                           | 0.76                  |
| Female                 | 17 (77.3%)             | 6.7±9.1                           |                       | 4 (50%)                | 3.3±1.0                           |                       |
| <b>Race</b>            |                        |                                   |                       |                        |                                   |                       |
| Black                  | 4 (18.2%)              | 7.8±8.1                           | 0.68                  |                        |                                   |                       |
| White                  | 18 (81.8%)             | 5.6±8.1                           |                       | 8 (100%)               |                                   |                       |
| <b>Histology</b>       |                        |                                   |                       |                        |                                   |                       |
| Adenocarcinoma         | 22 (100%)              |                                   |                       |                        |                                   |                       |
| Adenoma                |                        |                                   |                       | 8 (100%)               |                                   |                       |

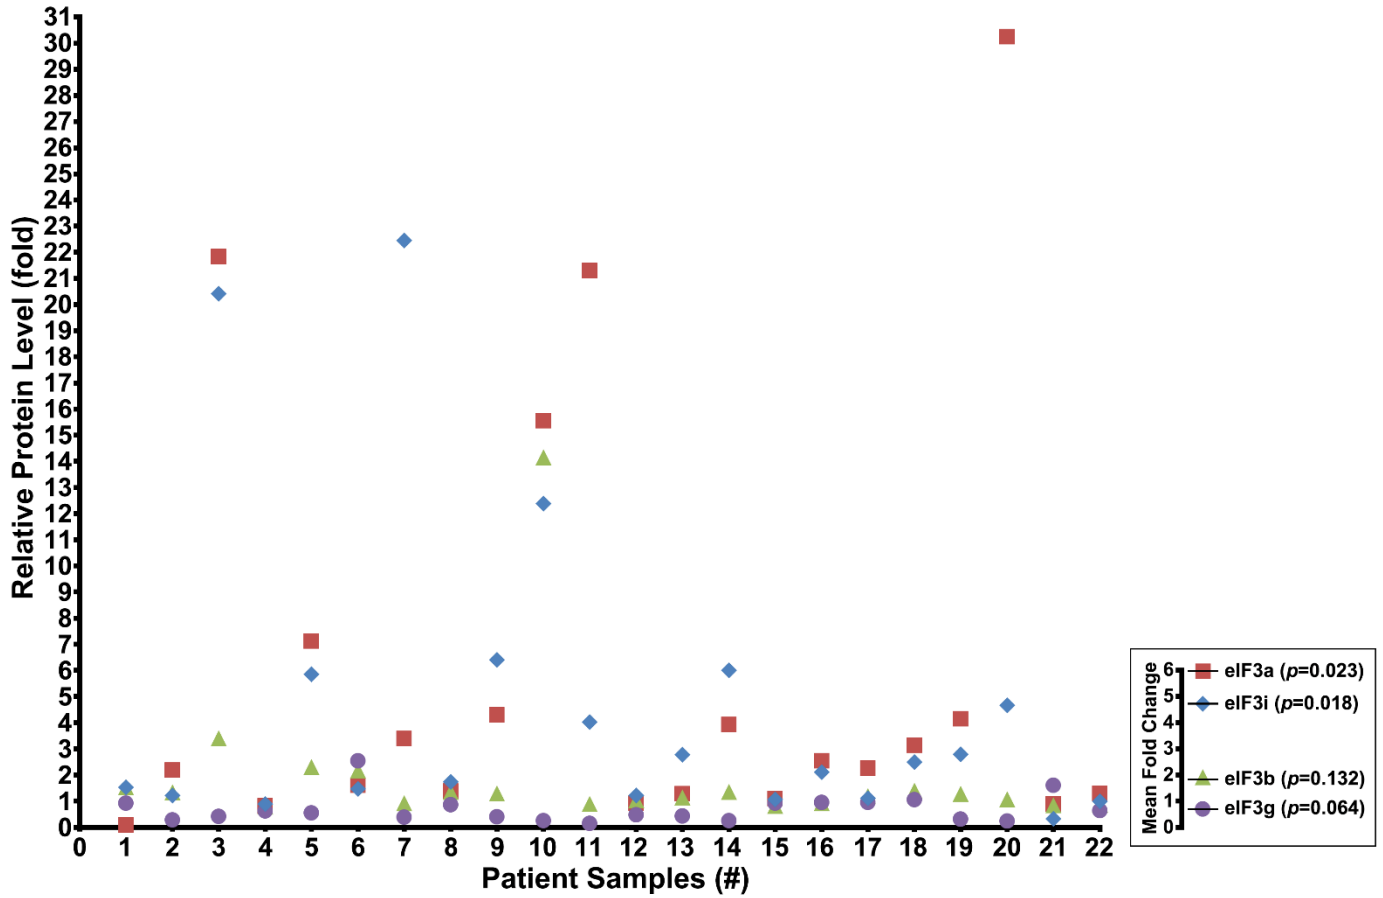

**Figure S1. Fold change of eIF3a, b, g, and i in cancer relative to paired normal tissues.** Each color-coded symbol represents fold change in the expression of eIF3a (■), eIF3b (▲), eIF3g (●), and eIF3i (◆) in each paired sample (cancer vs normal) as determined from Western blot in Figure 1A. The mean change of each subunit is shown in the box on the right.

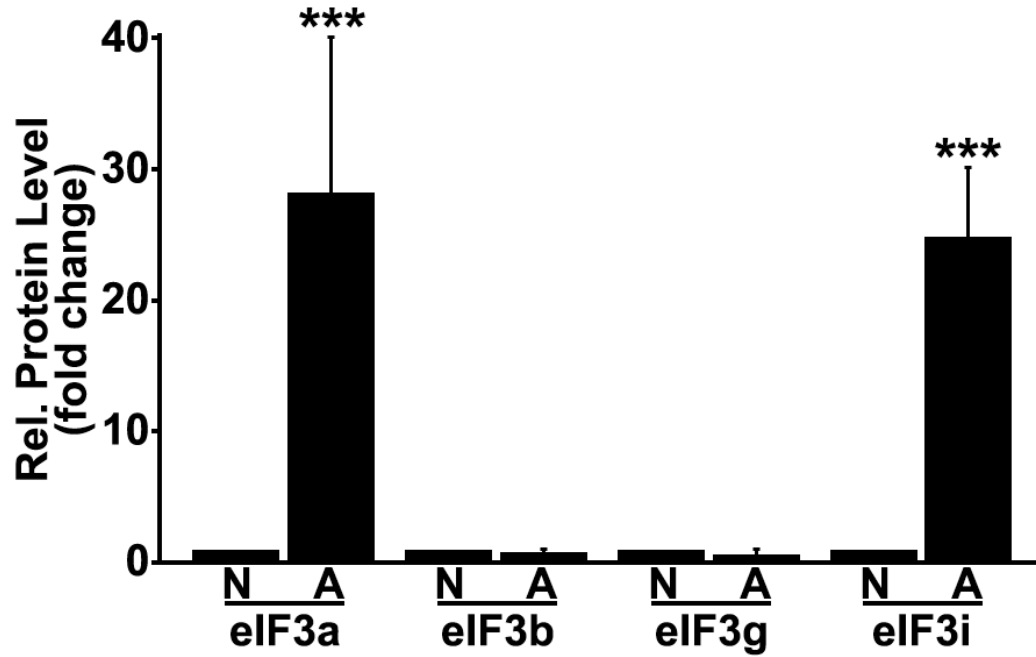

**Figure S2. Fold change of eIF3a, b, g, and i in adenoma polyps.** The relative protein level is the mean fold change in all eight adenoma (A) tissues normalized to that of the normal (N) tissue of patient #20. (\*\*\*) $p < 0.001$ .

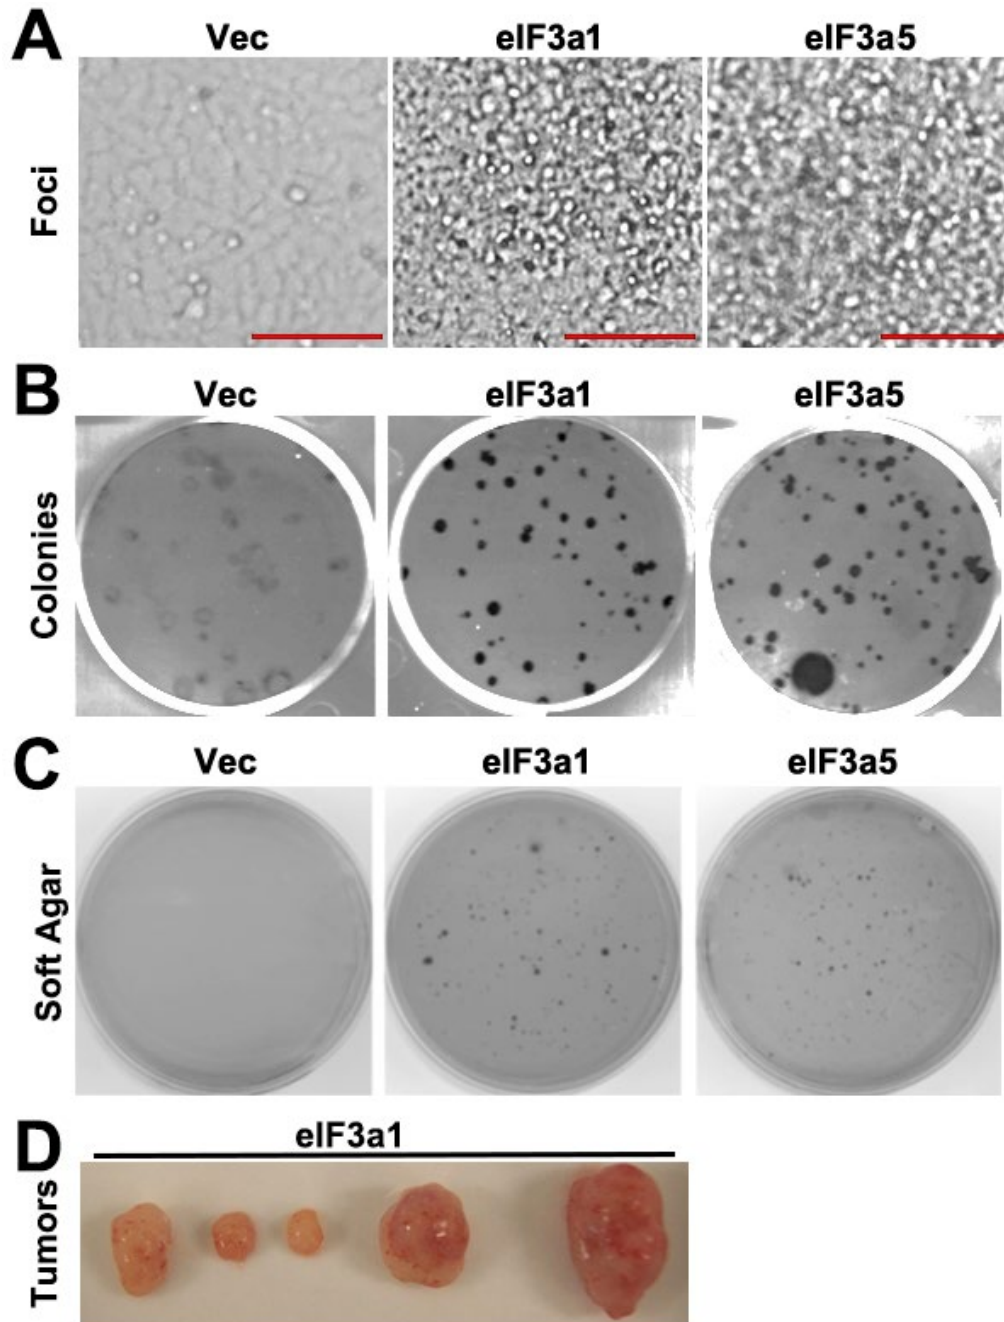

**Figure S3. Oncogenic function of eIF3a.** Stable RIE-1 clones with eIF3a over-expression, RIE/eIF3a1 (eIF3a1) and RIE/eIF3a5 (eIF3a5) or transfected with vector control RIE/Vec (Vec) were subjected to foci formation assay (A), clonogenic assay (B), and anchorage-independent growth assay in soft agar (C). Scale bar=25  $\mu$ m. Panel D shows the xenograft tumors derived from the stable RIE/eIF3a1 clone (eIF3a1) overexpressing eIF3a. No xenograft tumor was formed from RIE/Vec control cells.

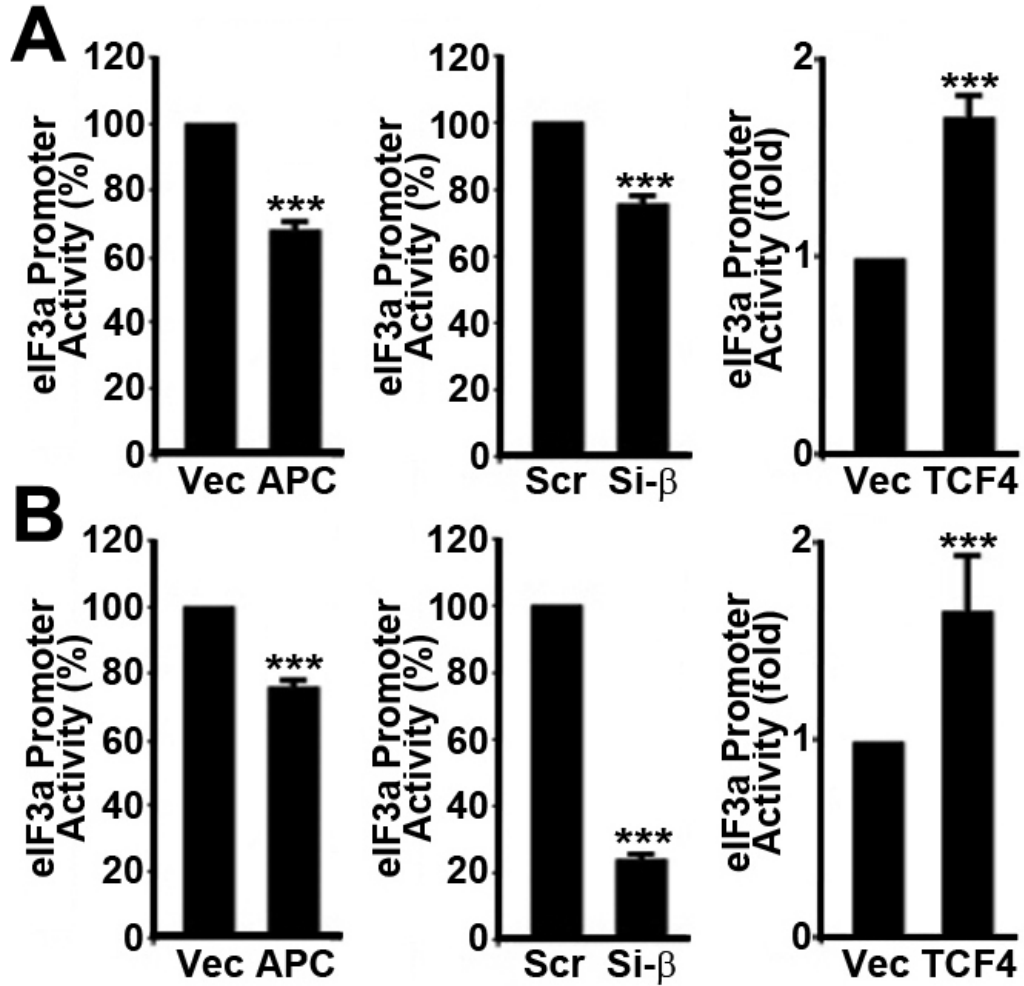

**Figure S4. Regulation of eIF3a promoter activity by APC,  $\beta$ -catenin, and TCF4.** Promoter activity of eIF3a in HEK293 (A) or H1299 (B) cells with over-expression of APC, TCF4 or with  $\beta$ -catenin knockdown as analyzed using reporter construct as described in Figure 5. Vector-transfected cells for APC and TCF4 over-expression or scrambled siRNA control for  $\beta$ -catenin knockdown were used as controls. (n=3, \*\*\*p<0.001).

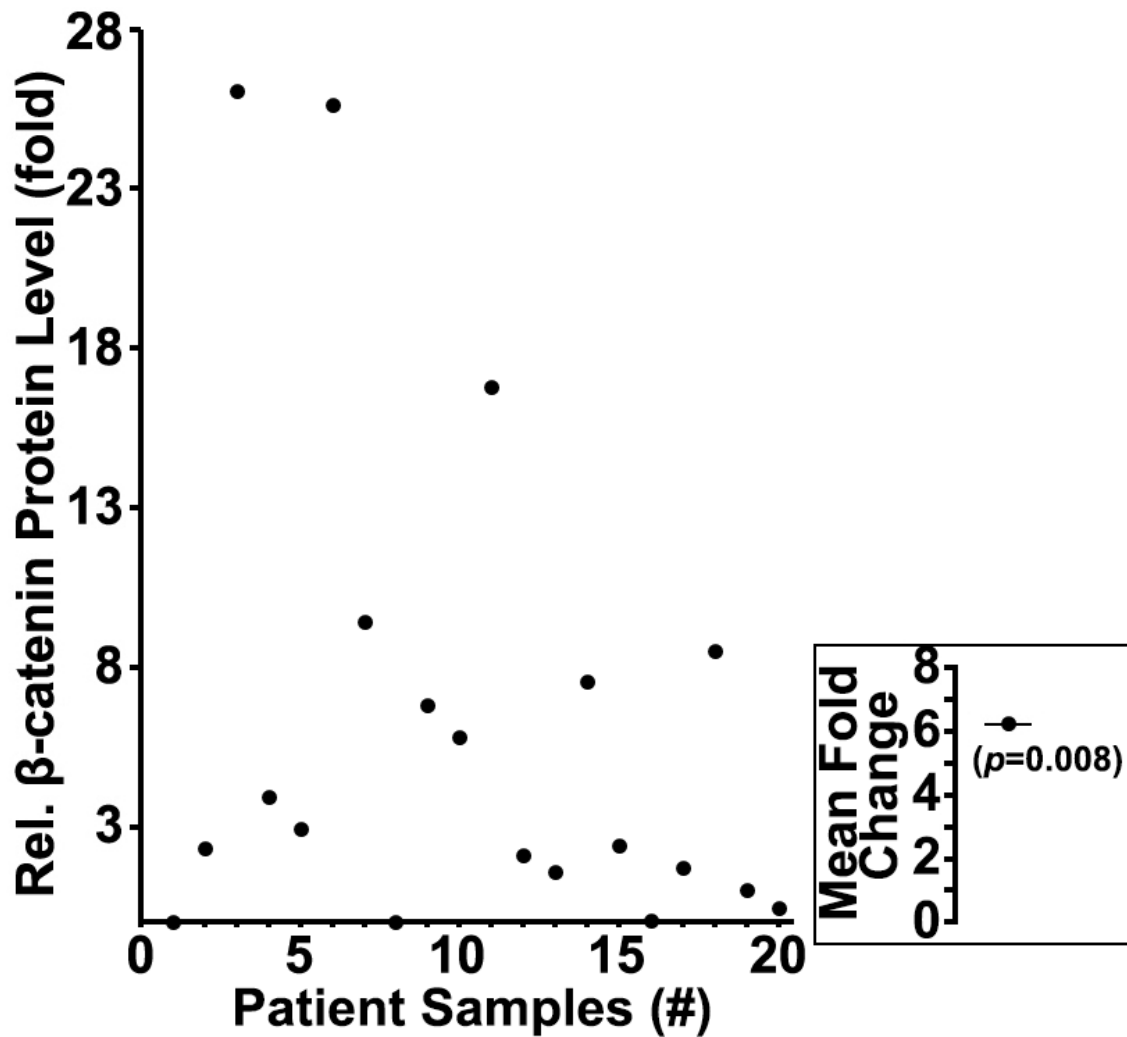

**Figure S5.** Fold change of  $\beta$ -catenin in cancer relative to paired normal tissues. Each dot represents fold change in the expression of  $\beta$ -catenin in each paired sample (cancer vs normal) as determined from the Western blot in Figure 6A. The mean fold change of  $\beta$ -catenin is shown in the box on the right.
